# Supplementary material
Source: publisher site journal article supplement (https://www.dovepress.com/get_supplementary_file.php?f=328693.docx)
Supplement: Supplementary file 1 [file get_supplementary_file.php]

**Appendix 1**

**Table S1: Data collection form**

| Patient reference number: |  | | |
| --- | --- | --- | --- |
| Patient age: |  | Gender:  Nationality: |  |
| Marital status: |  | Allergies |  |
| Date of admission |  | Date of discharge |  |
| Reason for admission/ hospitalisation  Initial diagnosis |  | | |
| Medical history /  Co-morbidities |  | | |
| Medication on admission  (total number of medication)  (Medication name, dose, frequency, duration) |  | | |
| Medication at discharge  (total number of medication)  (Medication name, dose, frequency, duration) |  | | |
| Clinical investigations  And any other abnormal blood test | Blood test  Hb  Na  K  Urea  Cr  eGFR  creatinine clearance  Liver function test  Patient weight  Patient height | | |
| Other relevant clinical information |  | | |
| Number of PIM |  | | |
| The identified PIM |  | | |
| Type of the identified PIM |  | | |
